1  
2  
3  
4  
5  
6  
7  
8  
9  
10  
11  
12  
13  
14  
15  
16  
17  
18  
19  
20  
21  
22  
23  
24  
25

Flexibility to contingency changes distinguishes habitual and goal-directed strategies in  
humans

Julie Lee<sup>1,#a\*</sup>, Mehdi Keramati<sup>1,#b</sup>

<sup>1</sup>Gatsby Computational Neuroscience Unit, University College London, London, UK

<sup>#a</sup>Current Address: Institute of Ophthalmology, University College London, London, UK

<sup>#b</sup>Current Address: Max Planck University College London Centre for Computational  
Psychiatry and Ageing Research, University College London, London, UK

\* Corresponding author

E-mail: [julie.lee.15@ucl.ac.uk](mailto:julie.lee.15@ucl.ac.uk) (JL)

## 1 **Abstract**

2           Decision-making in the real world presents the challenge of requiring flexible yet  
3 prompt behavior, a balance that has been characterized in terms of a trade-off between a  
4 slower, prospective goal-directed model-based (MB) strategy and a fast, retrospective  
5 habitual model-free (MF) strategy. Theory predicts that flexibility to changes in both reward  
6 values and transition contingencies can determine the relative influence of the two systems in  
7 reinforcement learning, but few studies have manipulated the latter. Therefore, we developed  
8 a novel two-level contingency change task in which transition contingencies between states  
9 change every few trials; MB and MF control predict different responses following these  
10 contingency changes, allowing their relative influence to be inferred. Additionally, we  
11 manipulated the rate of contingency changes in order to determine whether contingency  
12 change volatility would play a role in shifting subjects between a MB or MF strategy. We  
13 found that human subjects employed a hybrid MB/MF strategy on the task, corroborating the  
14 parallel contribution of MB and MF systems in reinforcement learning. Further, subjects did  
15 not remain at one level of MB/MF behaviour but rather displayed a shift towards more MB  
16 behavior over the first two blocks that was not attributable to the rate of contingency changes  
17 but was rather a more general effect of block order. The extent to which each subject used  
18 MB control was also related to reward earned, with a correlation between MB weight and  
19 reward rate. We demonstrate that flexibility to contingency changes can distinguish MB and  
20 MF strategies, with human subjects utilising a hybrid strategy that shifts towards more MB  
21 behavior over blocks, consequently corresponding to a higher payoff.

22

## 23 **Introduction**

24           To make optimal decisions, humans must learn to associate the choices they make  
25 with the outcomes that arise from them. Classical learning theories suggest that this problem

26 is addressed by habitual or goal-directed strategies for reinforcement learning [1, 2]. These  
27 strategies differ in that habitual behavior seeks simply to reinforce responses based on  
28 environmental cues, whereas goal-directed behavior considers action-outcome relationships –  
29 that is, contingencies – in the environment. Habitual and goal-directed strategies have been  
30 implemented in model-based (MB) and model-free (MF) reinforcement learning algorithms,  
31 respectively. Both algorithms make decisions by estimating action values and choosing the  
32 actions that maximize reward in the long term [3, 4]. The MF system achieves this  
33 retrospectively, caching past rewards using a reward prediction error signal [5] whereas the  
34 MB system achieves this prospectively, planning using a learned internal model of the state  
35 transitions and rewards in the environment.

36         Recent studies have emphasized that MB and MF systems work in parallel rather than  
37 in isolation [4, 6-8]. Early studies discerned MB and MF contributions using manipulations  
38 of reward values, such as in reward devaluation paradigms, but did not seek to quantify their  
39 relative contributions [1]. A recent study [6] addressed this by developing the hallmark “two-  
40 step” task in which, using reward value changes, each trial was informative of the MB/MF  
41 tradeoff, thereby permitting model-fitting analyses to quantify their relative influence in  
42 decision-making. Human subjects showed a hybrid MB/MF strategy in the task, a result that  
43 has been widely replicated under different manipulations [9, 10] and extended to the non-  
44 human animal literature (Groman et al. Soc. Neurosci. Abstracts 2014, 558.19, Miranda et al.  
45 Soc. Neurosci. Abstracts 2014 756.09, Akam et al. Cosyne Abstracts 2015, II-15; Hasz &  
46 Redish, Soc. Neurosci. Abstracts 2016 638.08; [11]).

47         Theory predicts that flexibility to transition contingency changes can – like flexibility  
48 to reward value changes – determine the relative influence of MB and MF strategies [4, 12].  
49 The advantage of manipulating transitions, rather than reward values, is apparent when  
50 contrasting the model-based system to a successor representation (SR) [13]. The successor

51 representation caches transitions in a model-free fashion, but learns reward values in a model-  
52 based fashion; thus, changes to reward values cannot distinguish MB and SR representations.  
53 In contrast, transition changes ensure that consequent choices only can be explained by an  
54 MB system. Two studies have examined the flexibility of MB and MF systems to global  
55 contingency changes [14, 15]. However, quantification of the MB/MF tradeoff was limited as  
56 these studies manipulated contingency and tested flexibility to the change of contingency in  
57 separate phases; at these timescales, it becomes difficult to exclude the effect of adaptation on  
58 MB/MF weights. Therefore, we developed a novel two-level contingency change task  
59 containing multiple, frequent and interleaved transition contingency changes that elicit  
60 different consequent actions by the MB and MF systems. Our design, like the two-step task  
61 [6] and its variants, therefore permits model-fitting analyses to robustly determine the relative  
62 influence of the MB/MF systems. The contingency change task is structured such that actions  
63 following frequent contingency changes are distinctly attributed to either a MB or MF  
64 strategy; this then permits quantification of the degree to which each system is in control.

65 On top of a hybrid MB/MF strategy, subjects may not remain at one level of MB/MF  
66 control but instead shift their relative weight in accordance with environmental factors. In  
67 general, animals show habit formation with time, a robust effect reported since early reward  
68 devaluation studies [16] in which extensive training stamped in habits, resulting in  
69 insensitivity to reward devaluation; in contrast, limited training retained goal-directed  
70 behavior. Sensitivity to contingency degradation (the omission of a previously-learned  
71 contingency between actions and outcomes) also decreases with overtraining, likewise  
72 reflecting a trend towards habitization with time [17]. In the original two-step task, the  
73 MB/MF trade-off was designed to be stable [6], but will shift under manipulations such as  
74 limited time [8] or cognitive load [18]. However, habits are not guaranteed to form with time;  
75 even after extended training, rats can show residual responding following outcome

76 devaluation, indicating that they retained goal-directed behavior despite overtraining [19]. In  
77 another study using the two-step task [20], the level of MB/MF control in fact increased in  
78 favour of more MB control (i.e. towards less habitual behavior) over three days of training.  
79 However, general shifts in MB/MF control should be disentangled from the effects of  
80 environmental volatility, which are known to affect the MB/MF balance [21]. Thus, in this  
81 study, we examined whether the MB/MF relationship is affected by environmental stability,  
82 or whether it shifts more generally over time.

83 We found that human subjects indeed showed a hybrid strategy in reacting to  
84 contingency changes in our task, with an increased influence of MB control over the first two  
85 blocks. However, relative MB/MF control did not significantly differ across rates of  
86 contingency changes; thus, the increase in MB control may be a more global effect of “anti-  
87 habitization” over time. The increased reliance on the MB system was associated with a  
88 higher proportion of highly rewarded actions and consequently a higher reward rate,  
89 indicating that as subjects proceeded through the session, they became more proficient at  
90 exploiting their learned internal model of the task structure to maximize their reward.

91

## 92 **Results**

93 Subjects (N=16) performed a two-level contingency change task which consisted of  
94 600 trials (Fig 1). Each trial began at either the first level (S0) with 50% probability, or the  
95 second level with 50% probability – 25% for each of the two states at this level (S1 or S2). If  
96 a trial started at the first level, a two-alternative choice was possible between two abstract  
97 stimuli. Each first-level action deterministically always led to the same second-level state, i.e.  
98 A1 to S1 and A2 to S2. Critically however, transitions from the second-level states to the  
99 terminal states flipped between two contingencies every 3-14 trials. Each of the two terminal  
100 states was then associated with either high or low reward, with the exact reward values

101 drifting across trials (see Methods for details). Thus, flexibility to contingency changes was  
 102 essential for maximizing reward.

103

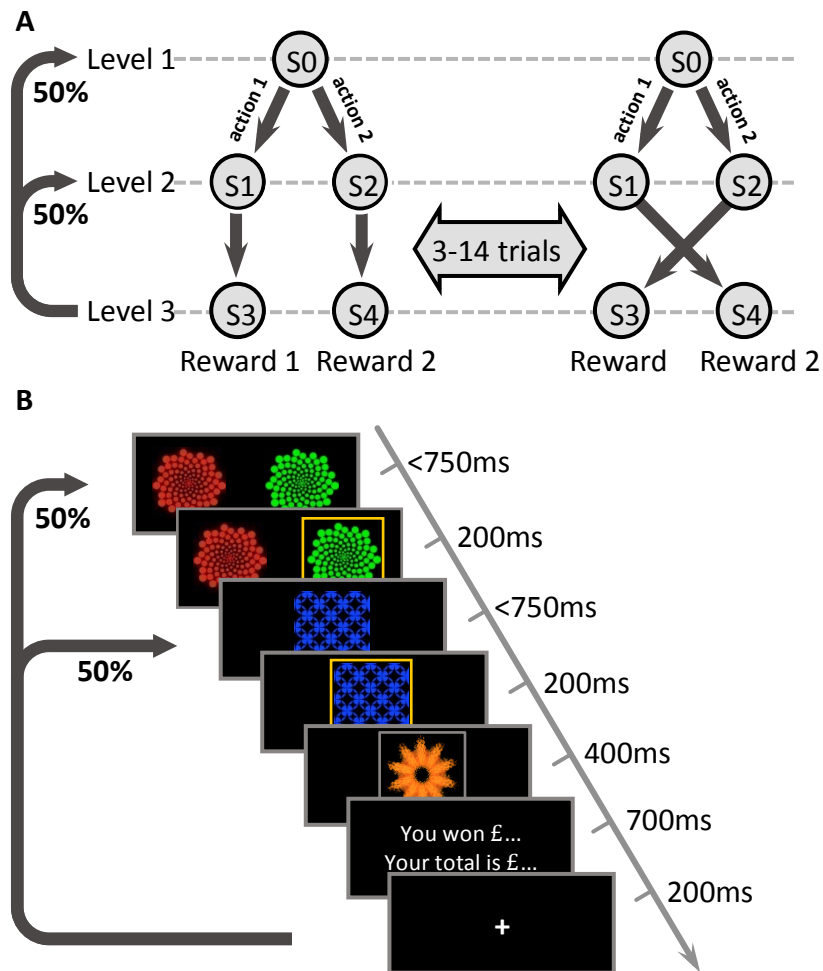

104

105 **Fig 1. Schematic of the experimental design.** (A) Each trial started from either the first-  
 106 level state (S0), with 50% probability, or one of the two second-level states (S1 or S2), each  
 107 with 25% probability. While two choices were available at S0, only a forced choice was  
 108 available at the second-level states. The transition structure from the second-level states to  
 109 terminal states repeatedly flipped after a random number of trials (every 3- 14), in an  
 110 unsignalled fashion. One of the two terminal states (S3 or S4) was associated with a high  
 111 reward outcome and the other with a low reward outcome. (B) Timeline of the task for one  
 112 example trial.

113

114           If a contingency change occurred, subjects always experienced the new transition  
115 structure regardless of whether they started at the first or second level, as contingency could  
116 only change between second-level and terminal states. Therefore, provided that an action was  
117 possible at the next trial (i.e. that the next trial started at the first level) the MB system would  
118 plan using the updated causal structure and thus would take the action that led under the new  
119 transition contingencies to the high reward terminal state. However, if a contingency change  
120 trial started from the second level, the MF system would not choose the optimal action on the  
121 next trial, as neither the received reward nor the new contingency would update the cached  
122 values of first-level actions, simply because no first-level action was experienced on those  
123 trials. As a result, the relative contribution of MB and MF systems can be measured by the  
124 degree of behavioral flexibility on first-level trials following contingency change trials  
125 starting from the second level.

126           To examine the effect of environmental volatility on the contribution of the two  
127 systems, the frequency of contingency changes was varied – from 3-6 trials for 200 trials, to  
128 7-10 trials for the next 200 trials, and then 11-14 trials for the final 200 trials. The order of  
129 fast and medium contingency changes was counterbalanced across two subject groups (n=8  
130 each). Every 40 trials, assignment of the high and low reward states also flipped to prevent  
131 formation of habits over an extended state representation, which could masquerade MF as  
132 MB behavior [22].

133           Simulated choices on the task were implemented according to MB and MF  
134 reinforcement learning algorithms (see Methods for details). For each system, we measured a  
135 “stay probability” index which followed the logic of contingency change trials described  
136 above. This index differs from classic stay probabilities [6] as trials starting from the second  
137 level do not have any choices to “stay”. Instead, stay probability in our task was defined as

138 the probability of choosing the first-level action that results in the same second-level state as  
139 the previous trial. Since first-level to second-level contingencies were fixed, this modified  
140 measure provided stay probabilities on any trial, regardless of whether it started at the first or  
141 second level. Stay probability was measured for four different conditions: whether the reward  
142 received in the previous trial was “high” or “low”, and whether the transition experienced in  
143 the previous trial, relative to the trial before that, was “changed” or remained “fixed”. In all  
144 cases, analyses were restricted to trials starting from the first level, following a contingency  
145 change trial starting at the second level, since only these could distinguish MB and MF  
146 strategies.

147         Across these conditions, MB and MF systems showed different stay probability  
148 patterns. The MF system, having no experience of the action that led to the new contingency,  
149 was more likely to stay on the action leading to the high reward state, and shift on the action  
150 leading to the low reward state, under “fixed” than “changed” conditions ( $p < 0.01$ ),  
151 indicating it was not flexible to changes in contingencies (Fig 2A). However, the MB system  
152 could immediately adapt with the correct next action, staying on the action if it would lead to  
153 the high-reward state but shifting if it would lead to the low-reward state, with a main effect  
154 of reward ( $p < 0.01$ ) regardless of contingency condition (Fig 2B). As expected, for  
155 contingency changes from the first level, MB and MF systems did not differ in stay  
156 probability patterns, as the MF system was able to update its action values accordingly, given  
157 that it directly experienced the action leading to the new contingency (S1 Fig). In addition to  
158 pure MF and pure MB strategies, we simulated a hybrid model that linearly weights MB and  
159 MF action values according to a parameter  $w_{MB}$ . The stay probability pattern produced by  
160 this hybrid system reflected a mixture of the effects observed for the pure MF and MB stay  
161 probabilities – that is, showing a main effect of reward ( $p < 0.01$ ), but also an interaction  
162 between reward and contingency ( $p < 0.01$ ) (Fig 2C).



163

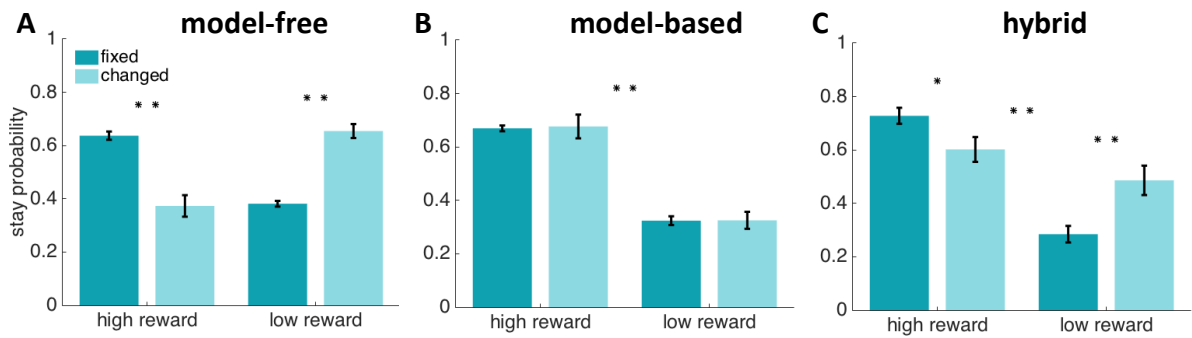

164

165 **Fig 2. Stay probability patterns predicted by simulating model-based (A), model-free**  
166 **(B), and hybrid (C) reinforcement learning algorithms.** Stay probability measures the  
167 probability of choosing the first-level action that results in the same second-level state as the  
168 previous trial. This index was measured when the reward received in the previous trial was  
169 “high” or “low”, and when the transition experienced in the previous trial (relative to the trial  
170 before that) had its contingency “changed” or remained “fixed”. Stay probabilities are plotted  
171 for trials following a change trial that started at the second level, as these distinguish model-  
172 based and model-free strategies. \*  $p < 0.05$ , \*\*  $p < 0.01$

173

174 Subjects showed hallmarks of both MB and MF strategies in reacting to contingency  
175 changes (Fig 3A), showing a main effect of reward,  $F(1,60) = 24.65$ ,  $p < 0.01$ , as well as a  
176 reward/contingency interaction,  $F(1,60) = 13.60$ ,  $p < 0.01$ . Therefore, subjects did not solely  
177 use a MB or MF strategy when reacting to contingency changes, but rather displayed a hybrid  
178 MB/MF strategy.

179

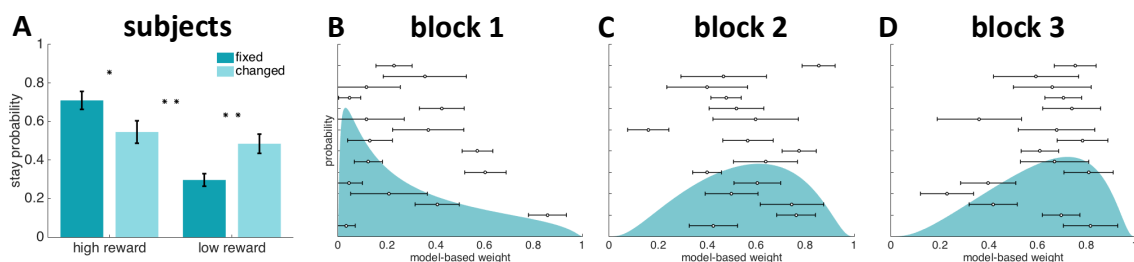

180

181 **Fig 3. Experimental results.** (A) Stay probability pattern from human subjects (N=16)  
182 showed significant effects of both model-based ( $p < 0.01$ ) and model-free ( $p < 0.01$ ) strategies.  
183 \*  $p < 0.05$ , \*\*  $p < 0.01$  (B) Probability density function over the model-based weight  
184 parameter, estimated in three different blocks of the first, middle and last 200 trials (out of  
185 600 trials). Overlaid are the individual subjects' model-based weight parameter estimates for  
186 each block type. Error bars represent standard deviation.

187

188 To characterize the effect of contingency changes over multiple consecutive trials,  
189 lagged logistic regression was performed (S2 Fig). This analysis computes the influence of  
190 reward and contingency conditions (predictors) from past trials (lags) on choice probabilities  
191 [22, 23]. MB and MF systems differed in the extent to which past predictors influenced the  
192 current choice, with the MB system showing more flexibility to recent changes – and less  
193 influence of past predictors – than the MF system; this was evidenced by a smoother  
194 predictive weight over lags for the MF system than the MB system (S2 Fig). As expected, the  
195 pattern of the predictive weights for subjects' choices and the simulated hybrid model  
196 reflected a mixture of the MF and MB systems' patterns.

197 While stay probabilities excluded a purely MB or purely MF strategy, this measure  
198 could not quantify the degree to which subjects used the hybrid strategy; therefore, we used a  
199 hierarchical Bayesian method to fit candidate models of behavior to the subjects' data, to  
200 determine which model best explained subjects' choices and to obtain parameter estimates for  
201 the MB/MF weighting used by the subjects. The models tested included a pure MB model, a  
202 pure MF model, a hybrid model with one constant weight  $w_{MB}$  across the session, a hybrid  
203 model with three separate  $w_{MB}$  weights for the three experimental blocks (which differed in  
204 terms of frequency of contingency changes: fast, medium, or slow), and a hybrid model with  
205 three separate  $w_{MB}$  weights for each range of contingency changes rates. The last two

206 models served to test whether the relative contribution of the two systems depended on  
207 volatility of transition structure, or instead more generally trial order. Model-fitting was  
208 confirmed to be able to recover true parameter values, as median estimated parameter values  
209 from model-fitting (see Methods for details) were well-correlated to known parameter values  
210 from simulations,  $r \geq 0.99$ ,  $p < 0.01$ .

211 Model-fitting results supported the existence of a hybrid MB/MF strategy in our task.  
212 Candidate models were compared using two criteria – integrated Bayesian Information  
213 Criterion which controls for number of parameters (iBIC) [24] and exceedance probabilities  
214 [25] (S2 Table). The hybrid model with three  $wMB$  weights over blocks outperformed the  
215 other candidate models on both criteria, with the lowest iBIC and a probability of 89.4% that  
216 it was the most common of the four models across subjects. Thus, from here we only discuss  
217 the results of best-fit model, the three-block hybrid model.

218 The median fitted  $wMB$  weights in the three-block hybrid increased across the three  
219 blocks (Fig 3B-D), indicating some extent of “anti-habitization” rather than habit formation.  
220 The increase of  $wMB$  from block 1 to block 2, but not the increase from block 2 to block 3,  
221 was significant according to permutation tests,  $p < 0.01$ . Stay probability analyses were not  
222 conducted on the three separate blocks, as slower contingency changes meant that the later  
223 blocks had fewer samples of contingency changes for comparison. The increase in  $wMB$   
224 across blocks was not attributable to differences in quality of fit from the model-fitting  
225 procedure, as the log-likelihood of parameter estimates did not differ significantly across  
226 blocks,  $F(2,45) = 1.42$ ,  $p > 0.05$ . Strength of correlations between fitted and simulated  $wMB$   
227 weights were also similar across blocks (block 1:  $r = 0.99$ , block 2:  $r = 1.00$ , block 3:  $r =$   
228  $0.99$ ;  $p < 0.01$  for all blocks). Therefore, the significant increase in  $wMB$  from the first to  
229 second block was not caused by differences in quality of model fit.

230 To confirm that the increase in model-based weight was not due to differences in the  
231 rate of contingency changes, we further analysed the fitted weights from the three-frequency  
232 hybrid model, which had a different  $wMB$  assigned to each range of contingency change  
233 rates, i.e. fast (every 3-6 trials), medium (every 7-10 trials) and slow (every 11-14 trials)  
234 contingency change blocks. The estimated  $wMB$  weights (S3 Fig) were not significantly  
235 different between fast vs. medium, or medium vs. slow frequency of contingency change  
236 blocks in permutation tests,  $p > 0.05$ . Thus, the increase in  $wMB$  in our study seemed to be an  
237 effect of block order rather than environmental volatility from differences in contingency  
238 change rates. In summary, subjects became more model-based across the first two blocks but  
239 did not differ in MB influence between different rates of contingency changes; therefore, it  
240 seems that block order, but not contingency change volatility, affects  $wMB$  in our task.

241 As subjects became more model-based, high reward choices and consequently reward  
242 rate also increased. Choice probabilities for the high reward action differed over blocks,  
243  $F(2,45) = 5.77$ ,  $p < 0.01$ , with post-hoc tests finding a significant increase between the first  
244 and third blocks ( $p < 0.01$ ) and the second and third blocks ( $p < 0.05$ ). Additionally, there  
245 was a significant difference in reward rate across blocks,  $F(2,45) = 3.83$ ,  $p < 0.05$ , increasing  
246 between the first and third blocks ( $p < 0.05$ ). Mean reaction time and number of missed trials  
247 due to timeout did not significantly change across blocks,  $p < 0.05$ ; therefore, the increase in  
248 high reward choices over blocks was not necessarily because subjects were worse at the task  
249 to begin with. Two analyses were performed to rule out the possibility of practice effects  
250 driving the association between reward rate and model-based weight. Within each block,  
251 there was a significant correlation of each subject's median  $wMB$  and reward rate (block 1:  $r$   
252  $= 0.66$ ,  $p < 0.01$ , block 2:  $r = 0.65$ ,  $p < 0.01$ , block 3:  $r = 0.56$ ,  $p < 0.05$ ), indicating that on an  
253 individual subject basis, the extent of MB control was related to reward earned. Since these  
254 analyses were conducted within blocks, the association with reward rate could not be

255 accounted for by block order. Additionally, the hybrid model was simulated using a range of  
256 MB weights (0, 0.2, 0.4, 0.6, 0.8 and 1) using the one-weight hybrid model for simplicity.  
257 There was a significant effect of MB weight on reward rate,  $F(5,90) = 8.5$ ,  $p < 0.01$ . In all,  
258 these findings suggest that MB influence in this task truly corresponded to a better “payoff”  
259 in terms of reward gained.

260

## 261 **Discussion**

262 We developed a novel two-level contingency change task in which flexibility to  
263 frequently-changing transition contingencies between states could determine whether subjects  
264 were using a model-based or a model-free strategy. Subjects showed a hybrid strategy when  
265 reacting to contingency changes, corroborating recent evidence of the parallel contribution of  
266 MB and MF systems in reward-guided decision-making. Importantly, this finding confirmed  
267 that changes to transition contingencies can elicit a balance of MB and MF behavior akin to  
268 changes to reward values. Model-fitting analyses indicated that a hybrid model with three  
269 MB weights best explained subjects’ choices, with relative MB control increasing over  
270 blocks. The rate of contingency changes did not significantly shift the MB/MF balance;  
271 rather, MB control increased over the first two blocks of trials. This increase in MB control  
272 was concurrent with an increased proportion of high reward choices and consequently  
273 increased reward rate; individually, each subject’s MB was also correlated with reward  
274 gained in the same block.

275 In all, these results illustrated that not only do subjects use a mixed MB/MF strategy,  
276 but within this hybrid strategy, the trade-off shifts towards “anti-habitization” across the first  
277 two blocks. This agrees with a previous study [20] that used the two-step task over three  
278 days, reporting that their subjects’ MB weight increased across days. One distinction between  
279 our findings is that in [20], subjects started relatively model-based (i.e. median  $w_{MB} > 0.5$ )

280 whereas in our case, subjects began relatively model-free (i.e. median  $w_{MB} < 0.5$ ). This  
281 difference in starting MB weight simply may be due to individual differences, which is  
282 evident even within our subject pool. Alternatively, differences could be accounted for by the  
283 relatively short reaction time limit in our task compared to theirs (750ms in ours vs. 2000ms).  
284 A shorter reaction time limit is known to provide a depth-of-planning pressure and favor  
285 more MF control [8]. Hence, our subjects may have started more model-free and only  
286 become more model-based once they mastered prospective planning of the task structure.  
287 This is supported by the lack of significant changes in reaction time across blocks, suggesting  
288 that subjects may have used the full extent of their time and eventually learned more efficient  
289 planning under time pressure, therefore showing increased MB influence over blocks.

290         These findings of an increase in MB control over blocks, however, goes against  
291 another study [26] using a similar task to the two-step task, that found an exponential decay  
292 in MB weight over the experimental session, or habit formation. This difference in findings is  
293 likely because they used a fixed rather than drifting amount of reward; in stationary  
294 environments such as these, habit formation can occur from overtraining, manifesting in an  
295 increase in MF rather than MB behavior [21]. Thus, these results point to the importance of  
296 maintaining a changing environment, as subjects can otherwise adapt to the change and  
297 become habitized.

298         Manipulations of the rate of contingency changes did not seem to affect MB/MF  
299 control. While it has been shown that environmental volatility can influence MB/MF levels in  
300 the context of reward value changes [21], in our case, the kind and range of contingency  
301 change volatility did not elicit a significant difference in relative MB/MF control. Further  
302 work is certainly needed to definitively rule out the possibility that environmental volatility in  
303 the form of the rates of contingency changes does not affect MB weight, but in the present

304 study, we find that subjects did not change their use of MB control with contingency change  
305 volatility, but rather increased MB influence more generally with block order.

306 In conclusion, in a two-level contingency change task, subjects showed a hybrid  
307 MB/MF strategy, emphasizing their parallel contribution in reacting to changes in transition  
308 contingencies. The inclusion of multiple, frequent changes allowed us to perform model-  
309 fitting; by doing so, we found an increase in MB control over the first two blocks, a result not  
310 detectable in model-agnostic analyses alone. Our results build on the literature of a hybrid  
311 MB/MF strategy in reacting to changes in reward values, demonstrating a mixture of  
312 strategies in reacting to multiple, frequent contingency changes that has yet been unexplored.  
313 This novel paradigm therefore provides another avenue for exploring the relationship  
314 between MB and MF control for future studies in neuropsychiatric disorders that may  
315 differentially implicate this balance between changes in transition contingencies and changes  
316 in reward values.

317

## 318 **Methods**

### 319 **Subjects**

320 Sixteen subjects (nine males, mean age 24 years) took part. The study was approved  
321 by the University College London Research Ethics Committee (Project ID 3450/002). All  
322 subjects provided written informed consent.

323

### 324 **Experimental procedure**

325 Subjects performed 600 trials of three blocks (200 each) which differed in frequency  
326 of contingency changes: fast (every 3-6 trials), medium (contingency change every 7-10  
327 trials) or slow (every 11-14 trials). Each subject was assigned to one of two groups (n=8  
328 each), which differed by the order of presentation of fast and medium contingency change

329 blocks, i.e. half of the subjects had fast, medium, then slow contingency changes, and the  
330 other half started with medium, fast, then slow frequency of contingency changes.

331 To ensure subjects understood the task structure, they were first trained with practice  
332 stimuli (35 trials) then trained on novel test stimuli without reward (55 trials) before starting  
333 the experimental session. Subjects were informed that contingency changes would occur, but  
334 did not know the frequency of changes nor that those rates would vary across the session.

335 At the first level, subjects had a two-alternative forced choice between two actions  
336 (pressing ‘S’ for the action available on the left side of the screen, ‘L’ for the right) with the  
337 presentation of stimuli randomized for the left/right side of the screen. To ensure that subjects  
338 recognized second-level states, they had to press ‘D’ if they encountered one of these states,  
339 and ‘K’ for the other. Both responses had a time limit of 750ms, following which the trial  
340 would end with no reward. Missed trials were not repeated.

341 Payoff at the high-reward terminal state varied with a drift rate of 0.2 and offset of  
342 0.15 to the bound of £1, with payoff at the low-reward terminal state being £1 minus the  
343 reward of the high-reward terminal state. Subjects received a fixed proportion of their total  
344 reward gained, with payoff bounded between £5 and £25. To make the task adequately  
345 difficult and prevent formation of complex state-space representations [22], high- and low-  
346 reward assignments switched every 40 trials between the two terminal states. This change  
347 was designed never to co-occur with contingency changes.

348

## 349 **Model**

350 Both model-free and model-based algorithms seek to estimate the values of state-  
351 action pairs in order to choose the actions which can maximize expected future rewards. The  
352 state space was modelled as having a first-level state  $s_0$  with two actions  $a_1$  and  $a_2$ , two  
353 possible second-level states  $s_1$  and  $s_2$ , and two possible terminal states  $s_3$  and  $s_4$ . There was



354 only one action available on second-level and terminal states, as the subject did not have any  
 355 choices at these levels.

356 The model-free algorithm updates values of state-action pairs using temporal  
 357 difference Q-learning [3, 27]. The reward  $r_t$  is used to compute a reward prediction error  $\delta_t$   
 358 which updates action values for that state  $s$  and action  $a$  at time  $t$ ,  $Q_{MF}(s_t, a_t)$ . At the first  
 359 level  $r_t$  is set to be 0 as there is no reward at this level.

$$\delta_t = r_t + \max_{a'} [Q_{MF}(s_{t+1}, a')] - Q_{MF}(s_t, a_t)$$

$$Q_{MF}(s_t, a_t) = Q_{MF}(s_t, a_t) + \alpha_{MF} \lambda \delta_t$$

360 The reward prediction error updates existing action values according to a learning rate  
 361  $\alpha_{MF}$  and modified by the eligibility parameter  $\lambda$ . Eligibility governs how much credit past  
 362 actions were given for outcomes, with  $\lambda = 0$  corresponding to a pure TD algorithm whereby  
 363 first-stage actions are updated only by the second-level action values, which in turn is  
 364 updated by terminal state rewards. In contrast,  $\lambda = 1$  means the algorithm updates first-level  
 365 actions only using the final reward from the terminal state reached on that trial.

366 The model-based algorithm learns both transition probabilities  $P_T$  and reward  
 367 probabilities  $R_T$ . The transition probabilities track the transition contingencies  $P_T$  between  
 368 states  $s$  and subsequent states  $s'$ . Upon encountering a contingency change, the model-based  
 369 system always updated its knowledge of both transitions.

$$P_T \left( s_1 \xrightarrow{a} s_3 \right) = \begin{cases} 1, & \text{if } s' = s_3, s = s_1 \\ 0, & \text{otherwise} \end{cases}$$

$$P_T \left( s_2 \xrightarrow{a} s_4 \right) = \begin{cases} 1, & \text{if } s' = s_4, s = s_2 \\ 0, & \text{otherwise} \end{cases}$$

$$P_T \left( s_1 \xrightarrow{a} s_4 \right) = 1 - P_T \left( s_1 \xrightarrow{a} s_3 \right)$$

$$P_T \left( s_2 \xrightarrow{a} s_3 \right) = 1 - P_T \left( s_2 \xrightarrow{a} s_4 \right)$$

370 The reward probabilities  $R_T$  use the reward  $r_t$  to update its subjective reward  $R$  for  
371 that state  $s$  and action  $a$  at time  $t$ .

$$R(s_t, a_t) = R(s_t, a_t) + \alpha_{MB}(R(s_t, a_t) - r_t)$$

372 These learned transition and reward functions are then used to update the action  
373 values for the model-based system,  $Q_{MB}$ .

$$Q_{MB}(s_t, a_t) = P_T(s \xrightarrow{a} s_3) \cdot R(s_3, a) + P_T(s \xrightarrow{a} s_4) \cdot R(s_4, a)$$

374 Other parameters from the simulated models included learning rates for model-based  
375 and model-free systems,  $\alpha_{MB}$  and  $\alpha_{MF}$ , and a stay bias which temporarily increased the action  
376 value for the previously-selected action regardless of outcome, to quantify a perseveration  
377 bias. These additional parameters improved fit even when controlling for model complexity  
378 (S3 Table).

379 For both systems, values for the non-selected action were updated as well, assuming  
380 that subjects knew that the reward for the selected action and reward for the non-selected  
381 action were negatively related, according to proposals of fictive reward [28]. Action values  
382 were updated for both visited and non-visited states, with the action values of non-visited  
383 states corresponding to  $1 - Q(s_t, a_t)$  of the visited states. The inclusion of fictive reward  
384 updates resulted in a better fit to the subjects' choices (S3 Table).

385 The hybrid model weighted MB and MF action values according to a parameter  
386  $wMB$ , with  $wMB = 1$  indicating fully MB control:

$$Q_{hybrid}(s_t, a_t) = wMB \cdot Q_{MB}(s_t, a_t) + (1 - wMB) \cdot Q_{MF}(s_t, a_t)$$

387 Action selection was then determined for all models according to a "softmax" rule  
388 which computes action probabilities as proportional to the exponential of the action values.

$$p(a_t = a_1 | s_t) = \frac{\exp(\beta \cdot Q(s_t, a_1))}{\exp(\beta \cdot Q(s_t, a_1)) + \exp(\beta \cdot Q(s_t, a_2))}$$

389           The inverse temperature  $\beta$  determined the extent to which action selection was  
390 stochastic or deterministic from action values, quantifying an exploration/exploitation trade-  
391 off.

392

### 393 **Simulations**

394           To best replicate the subjects' data of 600 trials for 16 subjects, each simulation was  
395 run for 16 initializations of 600 trials each. All reported simulations used fitted parameters  
396 from the three-block hybrid model for the learning rates  $\alpha_{MF}$  and  $\alpha_{MB}$ , inverse temperature  
397  $\beta$ , eligibility trace  $\lambda$  and stay bias (S1 Table).  $wMB$  values were 1 for pure MB and 0 for pure  
398 MF models.

399

### 400 **Model-fitting**

401           Subjects' data were fit to the models using mixed effects hierarchical model fitting.  
402 Estimation-maximisation was used which iteratively generates group-level distributions over  
403 individual subject parameter estimates, choosing the parameters that maximizes the  
404 likelihood of the data given those estimates. Parameters were estimated by minimizing the  
405 negative log-likelihood of parameter estimates using *fminunc* in Matlab (MathWorks).

406           To ensure the efficacy of  $wMB$  parameter estimation for the candidate model, each  
407 block  $wMB$  was simulated for 11 different parameter values: 0, 0.1, 0.2, ... 1. These resulted  
408 in a total of 33 parameter settings for  $wMB1$ ,  $wMB2$ ,  $wMB3$ , with 16 iterations per setting. All  
409 other parameters in the simulations were set constant as the median parameter estimates taken  
410 from the hybrid three-block model from model-fitting on the subjects' data. The same model-  
411 fitting procedure was performed on the simulated data and estimated parameter values were  
412 extracted.

413           The integrated Bayesian information criterion (iBIC) [24] was used to compare the  
414 fits of candidate models to the data, with lower scores indicating better fit; this criterion  
415 penalizes more complex models. Finally, Bayesian model selection [25] was used to examine  
416 the prevalence of each model in the participant population. This quantifies an exceedance  
417 probability, the probability that each model is the most common in the subject pool.

418

### 419 **Permutation tests**

420           Permutation tests were run to evaluate the probability that  $wMB$  could differ across  
421 blocks by chance. Subjects' blocks were randomly permuted such that each "block"  
422 contained a mixture of true first, second and third blocks. Model-fitting was run on each  
423 permutation to extract parameter estimates of  $wMB$  for each new "block". The probabilities  
424  $p(wMB_{block\ 2} > wMB_{block\ 1})$ , and  $p(wMB_{block\ 3} > wMB_{block\ 2})$  were then evaluated for each  
425 permutation. The occurrences of the random permutations which had a smaller  $p(wMB_{block\ 2} >$   
426  $wMB_{block\ 1})$ , and  $p(wMB_{block\ 3} > wMB_{block\ 2})$  than the true permutation were then tallied.

427           Likewise, to evaluate the effect of frequency of contingency changes, permutation  
428 tests were run to compare  $wMB$  for fast, medium and slow contingency change blocks. Each  
429 subject was randomly assigned to one of the two groups (which differed in the order of fast  
430 and medium contingency change blocks) then  $wMB$  of each frequency block was computed  
431 for each permutation. Both the aforementioned one-tailed permutation test and a two-tailed  
432 Hellinger distance permutation test were used.

433

### 434 **Acknowledgements**

435           Thanks to Peter Dayan for supervision and comments, and Thomas Akam for  
436 comments on the manuscript. JL is supported by a Wellcome Trust doctoral fellowship. MK  
437 is supported by the Gatsby Charitable Foundation.

439 **References**

- 440 1. Adams CD, Dickinson A. Instrumental responding following reinforcer devaluation.  
441 The Quarterly journal of experimental psychology. 1981;33(2):109-21.
- 442 2. Dickinson A, Balleine B. Motivational control of goal-directed action. *Animal*  
443 *Learning & Behavior*. 1994;22(1):1-18.
- 444 3. Sutton RS, Barto AG. Reinforcement learning: An introduction: MIT press  
445 Cambridge; 1998.
- 446 4. Daw ND, Niv Y, Dayan P. Uncertainty-based competition between prefrontal and  
447 dorsolateral striatal systems for behavioral control. *Nature Neuroscience*.  
448 2005;8:1704-11. doi: 10.1038/nn1560.
- 449 5. Schultz W, Dayan P, Montague PR. A neural substrate of prediction and reward.  
450 *Science*. 1997;275(5306):1593-9.
- 451 6. Daw ND, Gershman SJ, Seymour B, Dayan P, Dolan RJ. Model-Based Influences on  
452 Humans' Choices and Striatal Prediction Errors. *Neuron*. 2011;69:1204-15. doi:  
453 10.1016/j.neuron.2011.02.027.
- 454 7. Keramati M, Dezfouli A, Piray P. Speed/accuracy trade-off between the habitual and  
455 the goal-directed processes. *PLoS computational biology*. 2011;7:e1002055. doi:  
456 10.1371/journal.pcbi.1002055. PubMed PMID: 21637741.
- 457 8. Keramati M, Smittenaar P, Dolan RJ, Dayan P. Adaptive integration of habits into  
458 depth-limited planning defines a habitual-goal-directed spectrum. *PNAS*. 2016:1-16.  
459 doi: 10.1073/pnas.1609094113. PubMed PMID: 27791110.
- 460 9. Otto AR, Skatova A, Madlon-Kay S, Daw ND. Cognitive control predicts use of  
461 model-based reinforcement learning. *Journal of cognitive neuroscience*. 2014.

- 462 10. Wunderlich K, Smittenaar P, Dolan RJ. Dopamine Enhances Model-Based over  
463 Model-Free Choice Behavior. *Neuron*. 2012;75:418-24. doi:  
464 10.1016/j.neuron.2012.03.042. PubMed PMID: 22884326.
- 465 11. Miller KJ, Botvinick MM, Brody CD. Dorsal hippocampus plays a causal role in  
466 model-based planning. *bioRxiv*. 2016. doi: 10.1101/096594.
- 467 12. Balleine BW, O'Doherty JP. Human and Rodent Homologies in Action Control:  
468 Corticostriatal Determinants of Goal-Directed and Habitual Action.  
469 *Neuropsychopharmacology*. 2010;35:48-69. doi: 10.1038/npp.2009.131.
- 470 13. Dayan P. Improving generalization for temporal difference learning: The successor  
471 representation. *Neural Computation*. 1993;5(4):613-24.
- 472 14. Momennejad I, Russek EM, Cheong JH, Botvinick MM, Daw N, Gershman SJ. The  
473 successor representation in human reinforcement learning. *bioRxiv*. 2016:1-27. doi:  
474 10.1101/083824.
- 475 15. Gershman SJ, Markman AB, Otto AR. Retrospective revaluation in sequential  
476 decision making: A tale of two systems. *Journal of Experimental Psychology:*  
477 *General*. 2014;143(1):182.
- 478 16. Adams CD. Variations in the sensitivity of instrumental responding to reinforcer  
479 devaluation. *The Quarterly Journal of Experimental Psychology*. 1982;34(2):77-98.
- 480 17. Dickinson A. Omission learning after instrumental pretraining. *The Quarterly Journal*  
481 *of Experimental Psychology: Section B*. 1998;51(3):271-86.
- 482 18. Otto AR, Gershman SJ, Markman AB, Daw ND. The curse of planning: dissecting  
483 multiple reinforcement-learning systems by taxing the central executive.  
484 *Psychological science*. 2013;24(5):751-61.

- 485 19. Colwill RM, Rescorla RA. Instrumental responding remains sensitive to reinforcer  
486 devaluation after extensive training. *Journal of Experimental Psychology: Animal*  
487 *Behavior Processes*. 1985;11(4):520.
- 488 20. Economides M, Kurth-Nelson Z, Lübbert A, Guitart-Masip M, Dolan RJ. Model-  
489 Based Reasoning in Humans Becomes Automatic with Training. *PLoS computational*  
490 *biology*. 2015:1-19. doi: 10.1371/journal.pcbi.1004463.
- 491 21. Simon DA, Daw ND. Environmental statistics and the trade-off between model-based  
492 and TD learning in humans. *Advances in Neural Information Processing Systems*  
493 (NIPS). 2011:1-9.
- 494 22. Akam T, Costa R, Dayan P. Simple Plans or Sophisticated Habits? State, Transition  
495 and Learning Interactions in the Two-step Task. *PLoS computational biology*.  
496 2015:021428. doi: 10.1101/021428.
- 497 23. Miller KJ, Brody CD, Botvinick MM. Identifying Model-Based and Model-Free  
498 Patterns in Behavior on Multi-Step Tasks. *bioRxiv*. 2016:096339.
- 499 24. Huys QJ, Eshel N, O'Nions E, Sheridan L, Dayan P, Roiser JP. Bonsai trees in your  
500 head: how the Pavlovian system sculpts goal-directed choices by pruning decision  
501 trees. *PLoS Comput Biol*. 2012;8(3):e1002410.
- 502 25. Stephan KE, Penny WD, Daunizeau J, Moran RJ, Friston KJ. Bayesian model  
503 selection for group studies. *NeuroImage*. 2009;46:1004-17. doi:  
504 10.1016/j.neuroimage.2009.03.025.
- 505 26. Gläscher J, Daw Nathaniel D, Dayan P, O'Doherty JP. States versus Rewards:  
506 Dissociable Neural Prediction Error Signals Underlying Model-Based and Model-  
507 Free Reinforcement Learning. *Neuron*. 2010;66:585-95. doi:  
508 10.1016/j.neuron.2010.04.016.
- 509 27. Watkins CJ, Dayan P. Q-learning. *Machine learning*. 1992;8(3-4):279-92.

510 28. Lohrenz T, McCabe K, Camerer CF, Montague PR. Neural signature of fictive  
511 learning signals in a sequential investment task. Proceedings of the National Academy  
512 of Sciences. 2007;104(22):9493-8.

513 **Supporting Information**

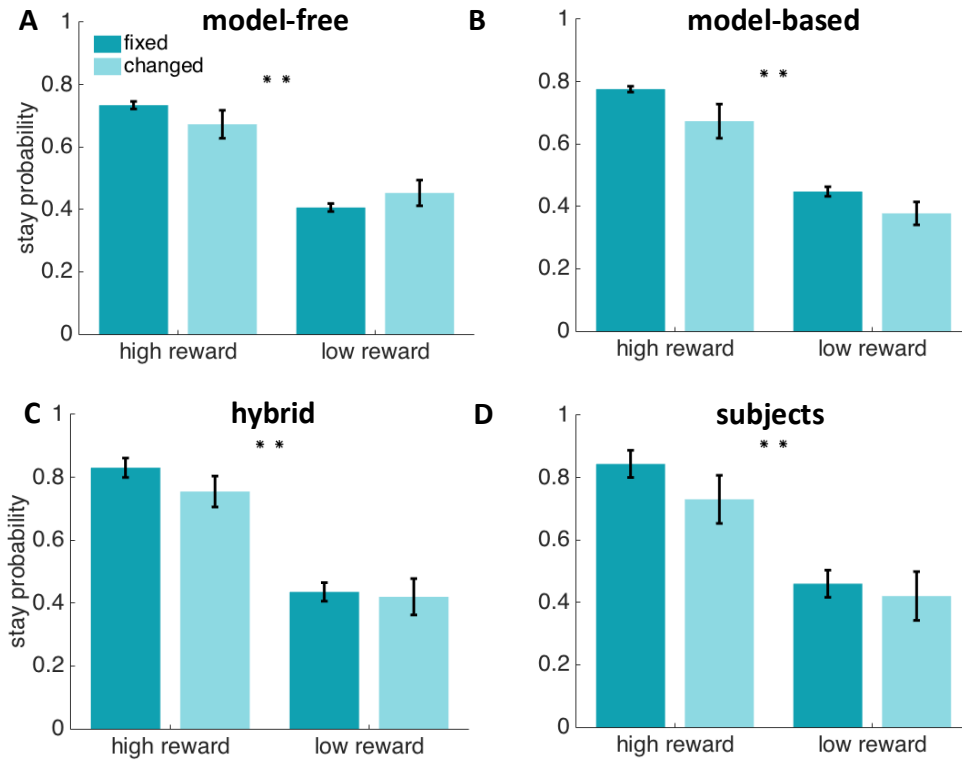

514  
515 **S1 Fig. Stay probability patterns after first level contingency changes predicted by**  
516 **simulating model-based (A), model-free (B), and hybrid (C) reinforcement learning**  
517 **algorithms, along with experimental results (D).** Stay-probability measures the probability  
518 of choosing the first-level action that results in the same second-level state as the previous  
519 trial, following a trial that started at the first level. For each system, this index was measured  
520 under four different conditions: when the reward received in the previous trial was “high” or  
521 “low”, and when the transition experienced in the previous trial (relative to the trial before  
522 that) “changed” or remained “fixed”. \*  $p < 0.05$ , \*\*  $p < 0.01$

523



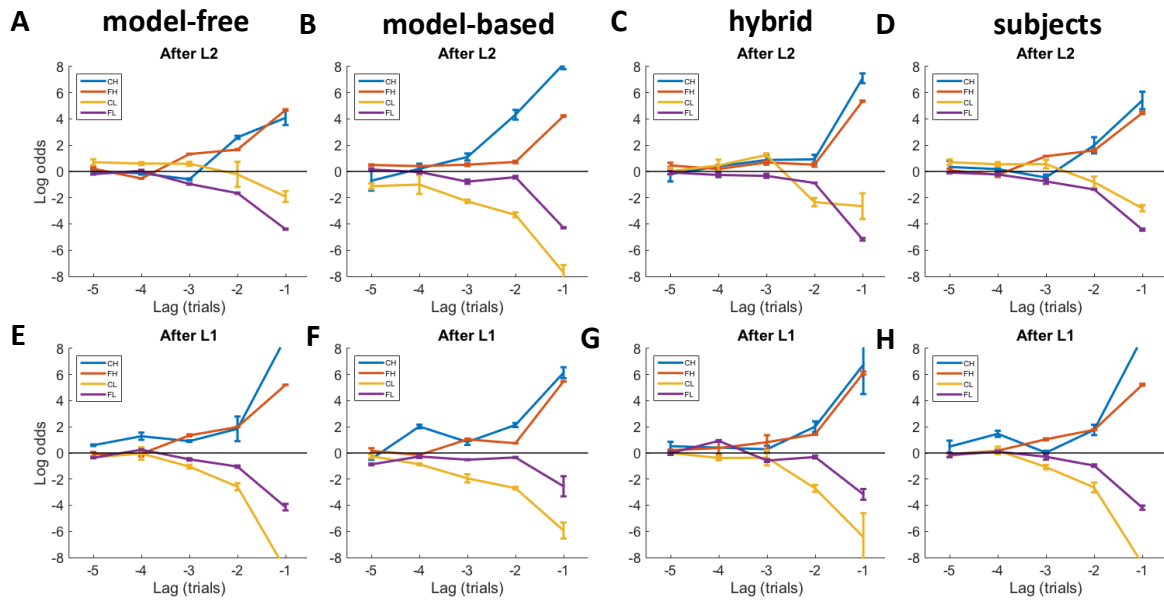

524

525 **S2 Fig. Predictive weights from lagged logistic regression after second level (A-D) or**

526 **first level (E-H) contingency changes predicted by simulating model-based (A, E),**

527 **model-free (B, F), and hybrid (C, G) reinforcement learning algorithms, along with**

528 **experimental results (D, H). Lagged logistic regression measures the influence of different**

529 **predictors over several trials in the past, in this case, five trials. For each system, this index**

530 **was measured under four different conditions: when the reward received in the previous trial**

531 **was high (H) or low (L), and when the transition experienced in the previous trial (relative to**

532 **the trial before that) “changed” (C) or remained “fixed” (F).**

533

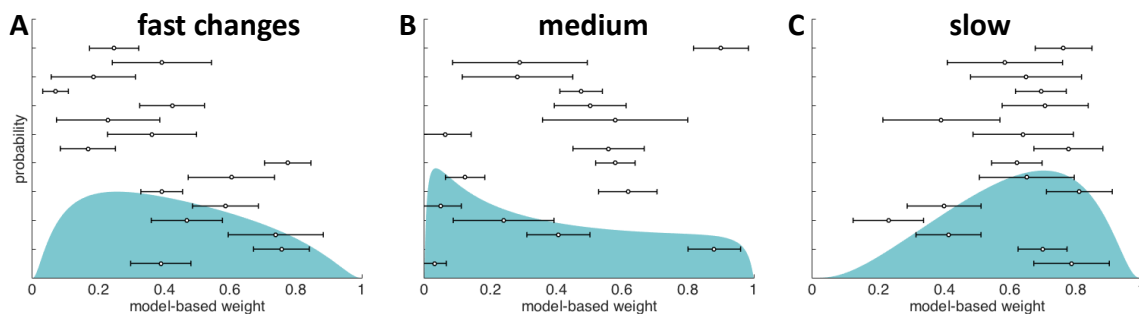

534

535 **S3 Fig. Model-based weights for different frequencies of contingency changes.**

536 **Probability density function over the model-based weight parameters estimated from model-**

537 **fitting, for the blocks of fast (every 3-6 trials), medium (every 7-10 trials) and slow (every**

538 11-14 trials) frequency of contingency changes. Overlaid are the individual subjects'  
 539 parameter estimates for each block type. Error bars represent standard deviation.

540

541 **S1 Table. Median Plus Quartile Group-level Parameter Estimates.** Best-fitting parameter  
 542 estimates over the subjects from model-fitting.

|                     | $\beta$ | Stay bias | $\alpha_{MB}$ | $\alpha_{MF}$ | $\lambda$ | $wMB$ (block 1) | $wMB$ (block 2) | $wMB$ (block 3) |
|---------------------|---------|-----------|---------------|---------------|-----------|-----------------|-----------------|-----------------|
| <b>1st quartile</b> | 1.88    | 0.04      | 0.55          | 0.03          | 0.30      | 0.10            | 0.40            | 0.48            |
| <b>Median</b>       | 2.99    | 0.10      | 0.70          | 0.30          | 0.47      | 0.23            | 0.57            | 0.63            |
| <b>3rd quartile</b> | 4.73    | 0.22      | 0.81          | 0.85          | 0.65      | 0.46            | 0.71            | 0.76            |

543

544 **S2 Table. Model Comparison of Candidate Models.** Integrated Bayesian Information  
 545 Criterion (iBIC) and negative log-likelihood of all candidate models from model-fitting. The  
 546 models tested were: pure model-free (“MF”), pure model-based (“MB”), hybrid MB/MF  
 547 (“hybrid”), hybrid MB/MF with different weights fitted for each of the three 200-trial blocks  
 548 (“three-block hybrid”), and a hybrid model with different weights fitted for each frequency of  
 549 contingency changes (“three-frequency hybrid”). The winning model was the three-block  
 550 hybrid, highlighted in gray, according to iBIC and Bayesian model selection [25].

| <b>Model</b>                   | <b>Model-free</b> | <b>Model-based</b> | <b>Hybrid</b> | <b>Three-block hybrid</b> | <b>Three-frequency hybrid</b> |
|--------------------------------|-------------------|--------------------|---------------|---------------------------|-------------------------------|
| <b>Parameters</b>              | 4                 | 3                  | 6             | 8                         | 8                             |
| <b>iBIC</b>                    | 9051              | 8091               | 7938          | 7687                      | 7711                          |
| <b>Negative Log Likelihood</b> | 4489              | 4018               | 3914          | 3770                      | 3782                          |

551

552 **S3 Table. Model Comparison of Additional Parameters.** Integrated Bayesian Information  
 553 Criterion (iBIC) and negative log-likelihood of the winning three-block hybrid model with

554 different weights fitted for each of the three 200-trial blocks and the same model without stay  
 555 bias, with  $\lambda = 1$ , with  $\lambda = 0$ , with only one learning rate for both MF and MB systems, and  
 556 without updating fictive reward. The full model fit better to the data than the same model  
 557 without each of the aforementioned parameters, even when controlling for model complexity  
 558 in the iBIC.

| <b>Model</b>                   | <b>Full model</b> | <b>No stay bias</b> | <b><math>\lambda = 1</math></b> | <b><math>\lambda = 0</math></b> | <b>One learning rate</b> | <b>No fictive reward</b> |
|--------------------------------|-------------------|---------------------|---------------------------------|---------------------------------|--------------------------|--------------------------|
| <b>Parameters</b>              | 8                 | 7                   | 7                               | 7                               | 7                        | 8                        |
| <b>iBIC</b>                    | 7687              | 8047                | 7702                            | 7754                            | 7774                     | 8024                     |
| <b>Negative Log Likelihood</b> | 3770              | 3959                | 3787                            | 3813                            | 3823                     | 3939                     |

559
